# Supplementary material
Source: PubMed Central journal article supplement (PMC6788040)
Supplement: ao9b01317_si_001.pdf [file ao9b01317_si_001.pdf]

# Supporting Information

## **Rapid prototyping of open-surface microfluidic platform using wettability-patterned surfaces prepared by atmospheric-pressure plasma jet**

She-Ting Wu<sup>a</sup>, Chen-Yu Huang<sup>b</sup>, Chih-Chiang Weng<sup>c</sup>, Chia-Chih Chang<sup>a</sup>, Bor-Ran Li<sup>d, e, \*</sup>, and Chain-Shu Hsu<sup>a, e, \*</sup>

<sup>a</sup>Department of Applied Chemistry, National Chiao Tung University, 1001 Ta Hsueh Road, Hsin-Chu 30049, Taiwan.

<sup>b</sup>Department of Physics and Astronomy, Johns Hopkins University, 3400 N. Charles St., Baltimore, MD 21218, USA.

<sup>c</sup>Mechanical and Mechatronics Systems Research Laboratories, Industrial Technology Research Institute, Hsinchu 31040, Taiwan.

<sup>d</sup>Institute of Biomedical Engineering, National Chiao Tung University, 1001 Ta Hsueh Road, Hsin-Chu 30049, Taiwan.

<sup>e</sup>Center for Emergent Functional Matter Science, National Chiao Tung University, Hsinchu 30049, Taiwan.

\*E-mail: liborran@g2.nctu.edu.tw (BR Li)

\*E-mail: cshsu@mail.nctu.edu.tw (CS Hsu)

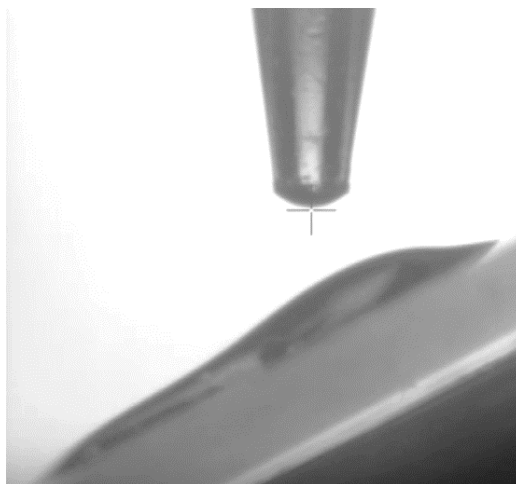

**Figure S1** Sliding of 5 $\mu$ L water droplets against the HMDSO- and AAC- modified wettability-patterned surface tilted at 30°.

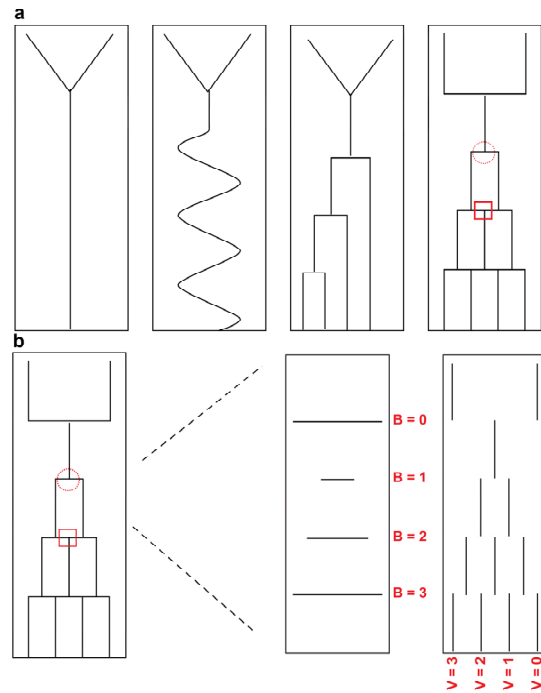

**Figure S2** Design of first and second masks (a) Y junction channels, serpentine-shaped channels, concentration gradient generator without merging channels, and concentration gradient generator with merging channels (b) Merging channels with two parts of masks : branch-cut-shaped mask with a four-branch order within the branched system (We denoted each channel as B=0, B=1, B=2, and B=3) and vertical-shaped mask of the concentration profiles within the branched system (We denoted each channel as V=0, V=1, V=2, and V=3).

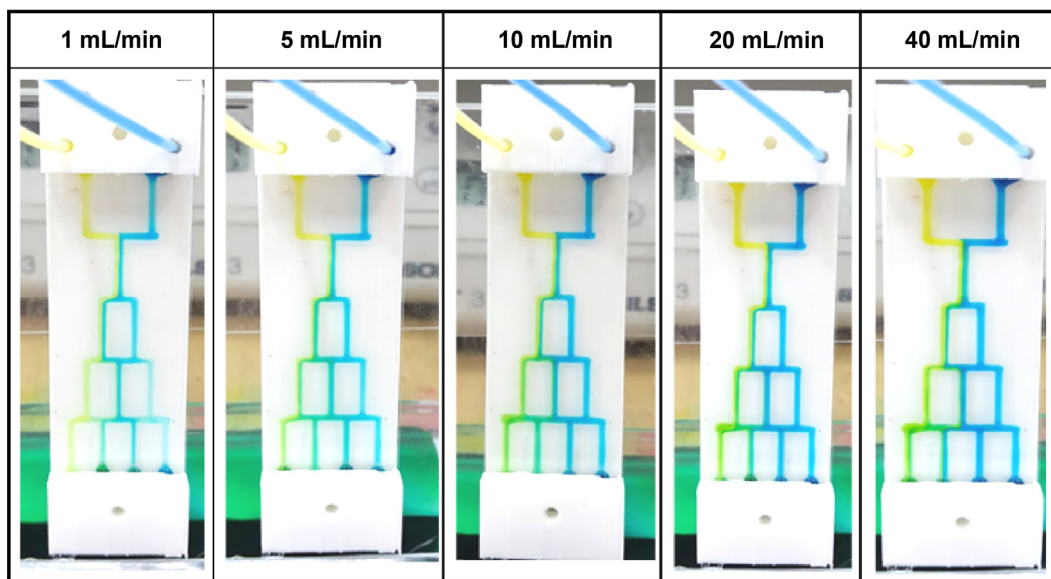

**Figure S3** Grading channels with different flow rates for a tilt angle of  $70^\circ$ .

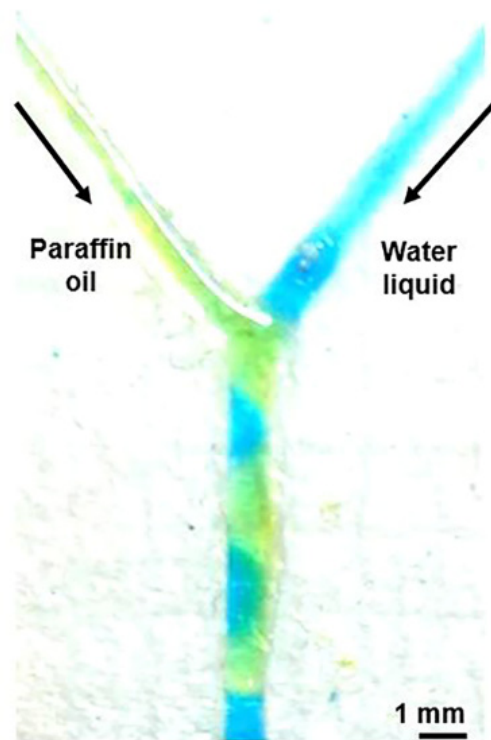

**Figure S4** Oil wettability test using Y junction channel for a tilt angle of 30°.

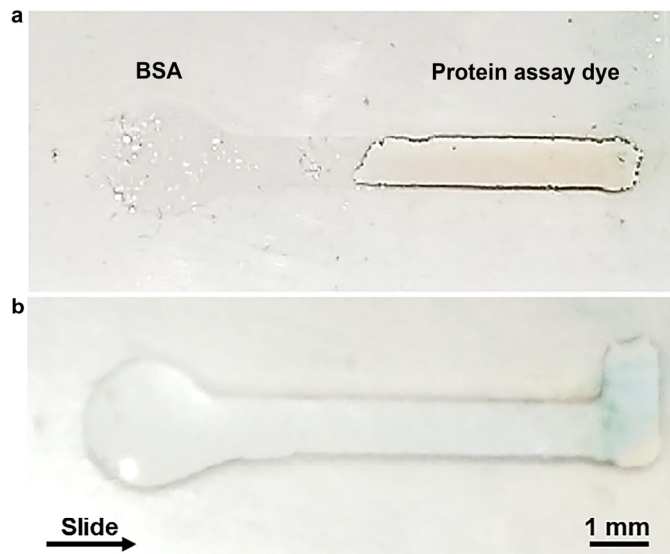

**Figure S5** Mixing test (diffusion): (a) Using separate regions coated with BSA and protein assay dye. The gap between the regions is 2 mm. (b) Mixing test (diffusion) for a tilt angle of  $30^\circ$ .
